# Supplementary material
Source: PubMed Central journal article supplement (PMC2978916)

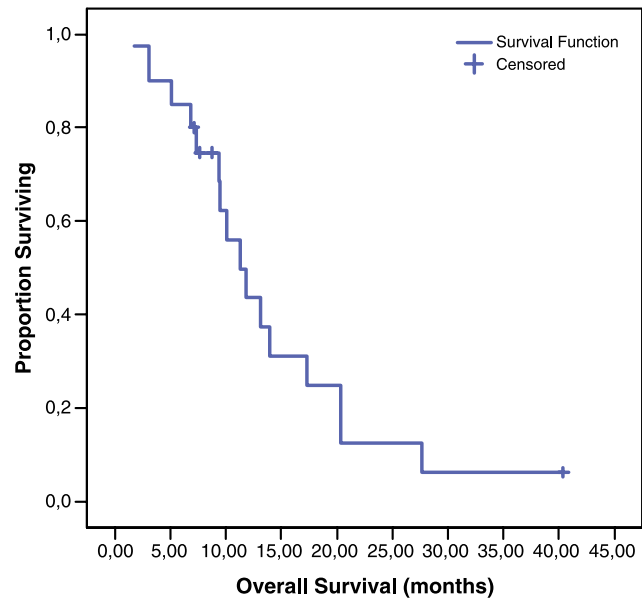

**Figure W1.** Overall Survival in 19 Eligible Patients.

Supplement: neo1211_0941SD1.pdf [file neo1211_0941SD1.pdf]
